# Supplementary material
Source: PubMed Central journal article supplement (PMC5382134)

# Suppl. Figure 1

**a**

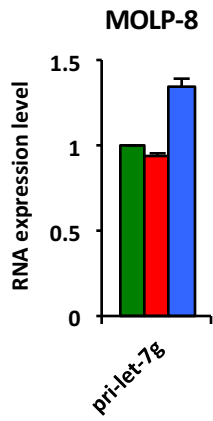

**b**

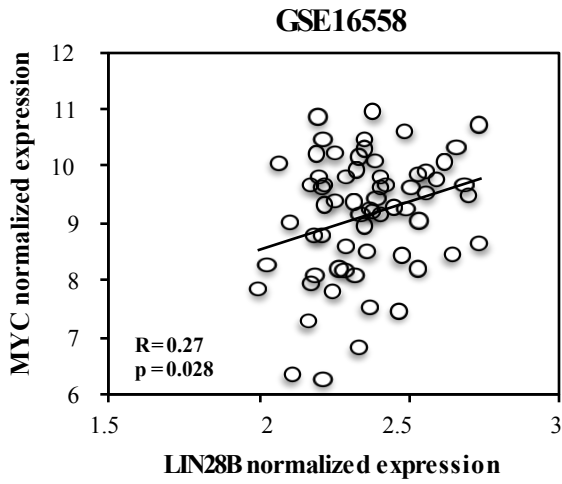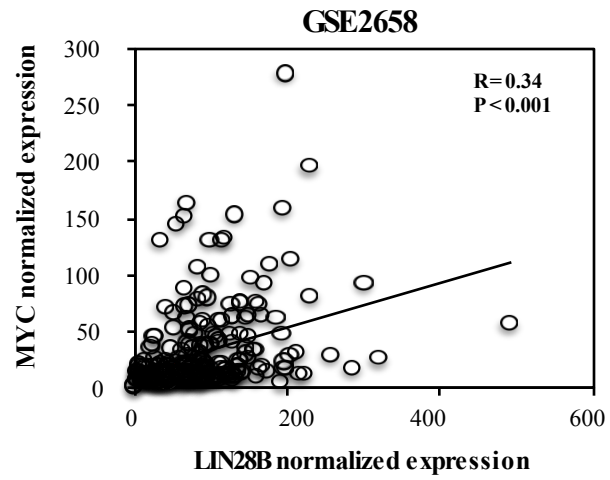

**c**

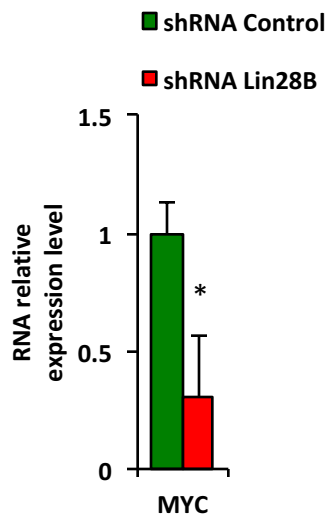

## Suppl. Figure 2

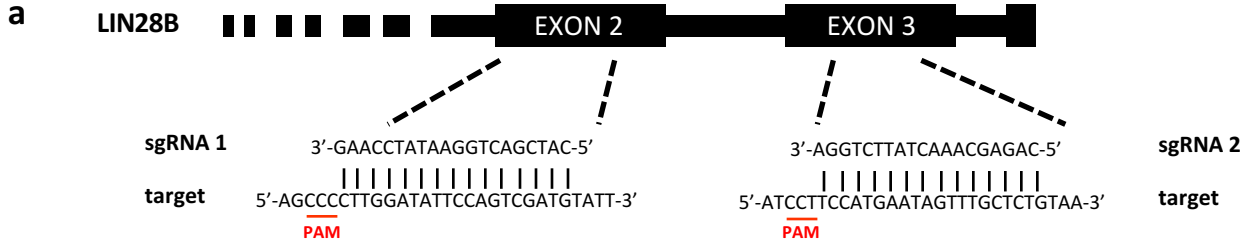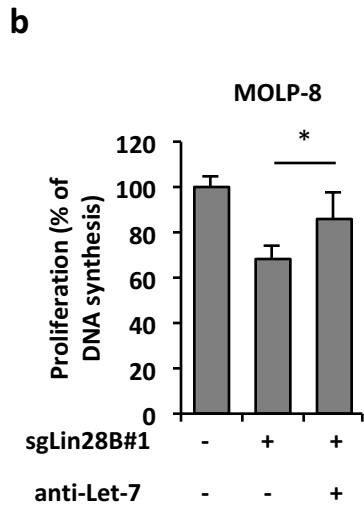

### Suppl. Figure 3

**a**

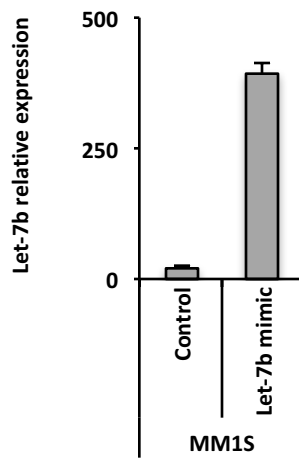

**b**

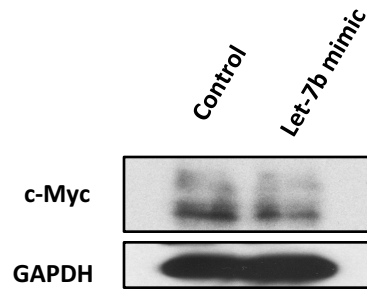

## Suppl. Figure 4

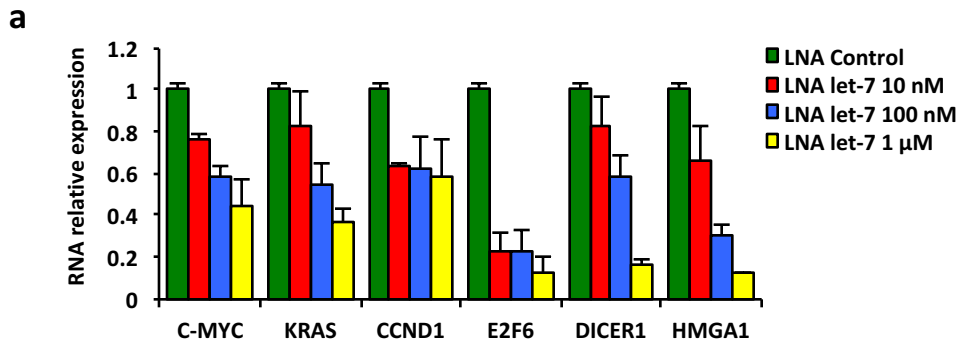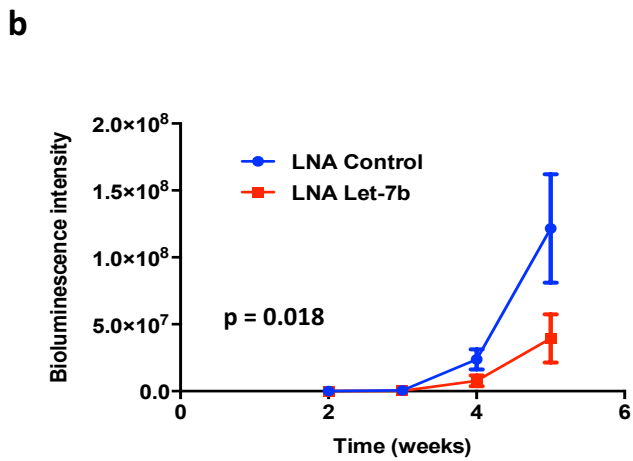

Suppl. Figure 5

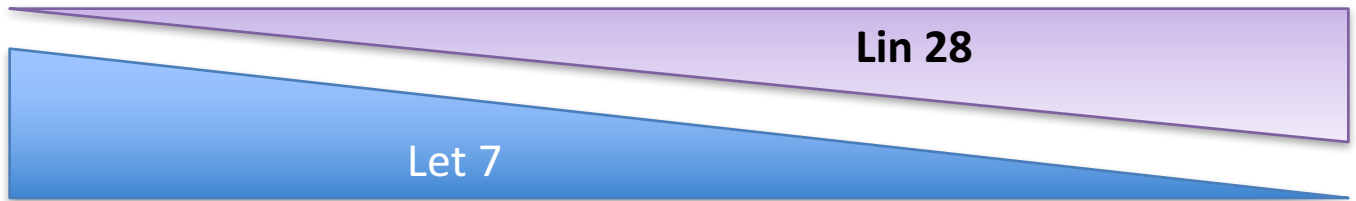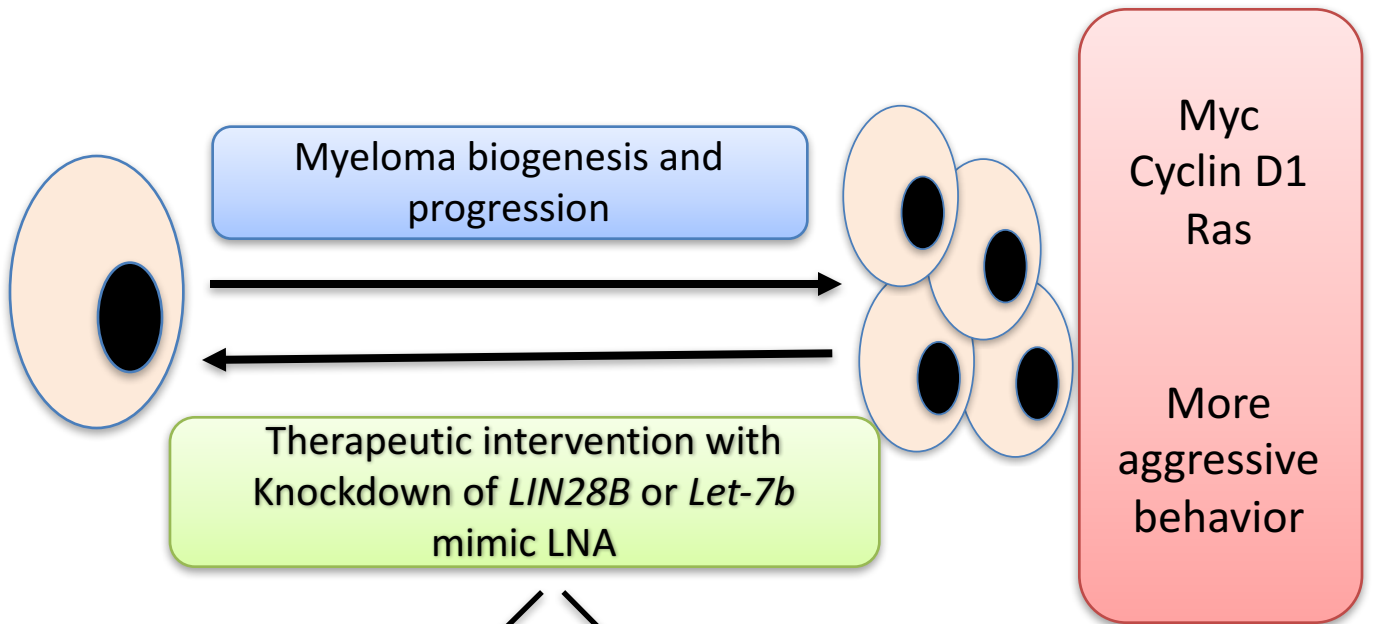

Let-7b mimic LNA

Lin28B knockdown or knockout

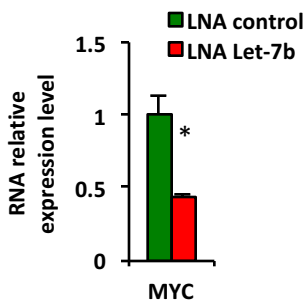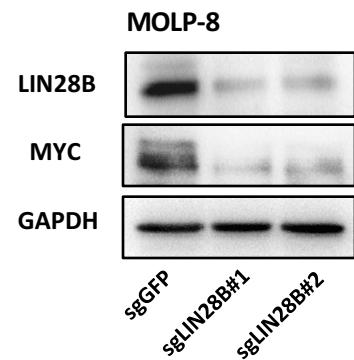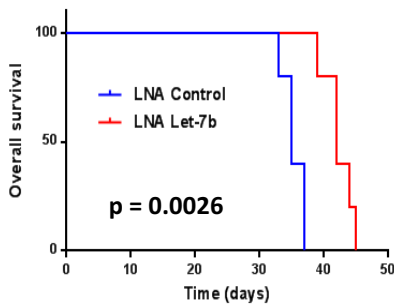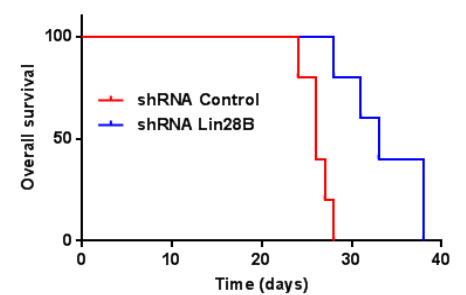

Supplement: NIHMS818310-supplement-1.pdf [file NIHMS818310-supplement-1.pdf]
